# Supplementary material for: Ultralow pressure sensing and luminescence thermometry based on the emissions of Er3+/Yb3+ codoped Y2Mo4O15 phosphors
Source: Royal Society of Chemistry journal article supplement (doi:10.1039/d3dt02613b), 2023-01-01
Supplement: d3dt02613b1.pdf [file d3dt02613b1.pdf]

## Electronic supplementary information

### Ultralow pressure sensing and luminescence thermometry based on emissions of Er<sup>3+</sup>/ Yb<sup>3+</sup> codoped Y<sub>2</sub>Mo<sub>4</sub>O<sub>15</sub> phosphors.

**Kamel Saidi** <sup>\*(a)</sup>, **Christian Hernández-Álvarez** <sup>(b)</sup>, **Marcin Runowski**<sup>\*(b,c)</sup>, **Mohamed Dammak** <sup>(a)</sup>

**Inocencio R. Martín** <sup>(b)</sup>

(a) Laboratoire de Physique Appliquée, Groupe des Matériaux Luminescents, Faculté des Sciences de Sfax, Département de Physique, Université de Sfax, BP, Sfax, Tunisia.

(b) Universidad de La Laguna, Departamento de Física, MALTA- Consolider Team, IMN and IUdEA Apdo. Correos 456, E-38206, San Cristóbal de La Laguna, Santa Cruz de Tenerife, Spain.

(c) Adam Mickiewicz University, Faculty of Chemistry, Department of Rare Earths, Uniwersytetu Poznańskiego 8, 61-614 Poznań, Poland.

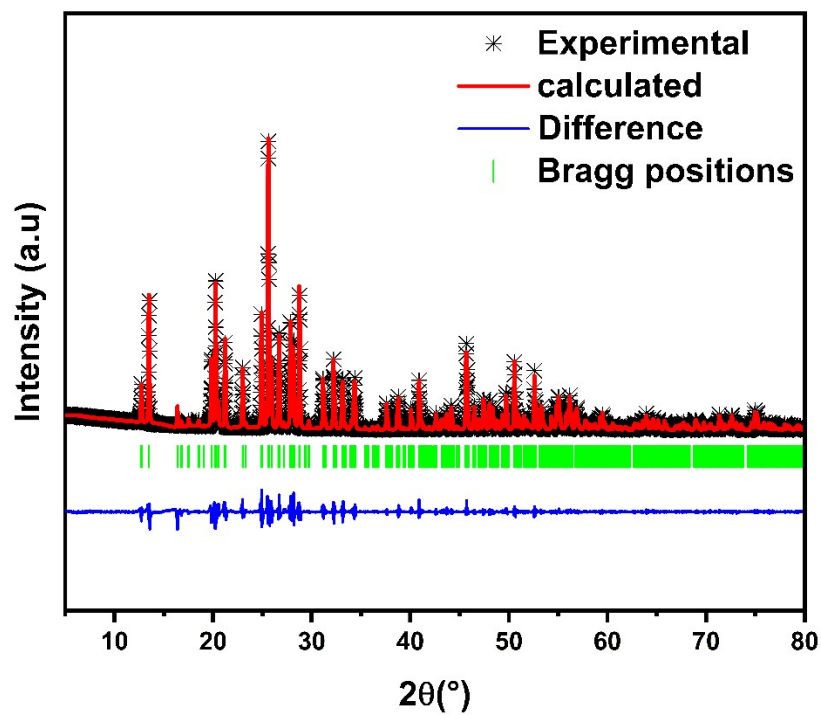

Figure S1. XRD Rietveld refinement of YMO.

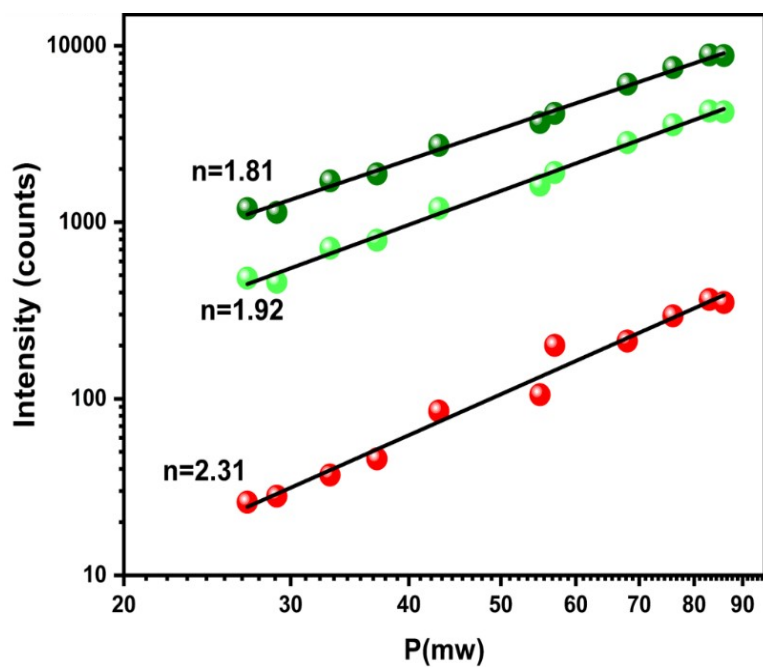

Figure S2. (a) Relationship of  $\text{Er}^{3+}$  emission in YMO: 2%  $\text{Er}^{3+}$ / 20%  $\text{Yb}^{3+}$  when pump power is increased.

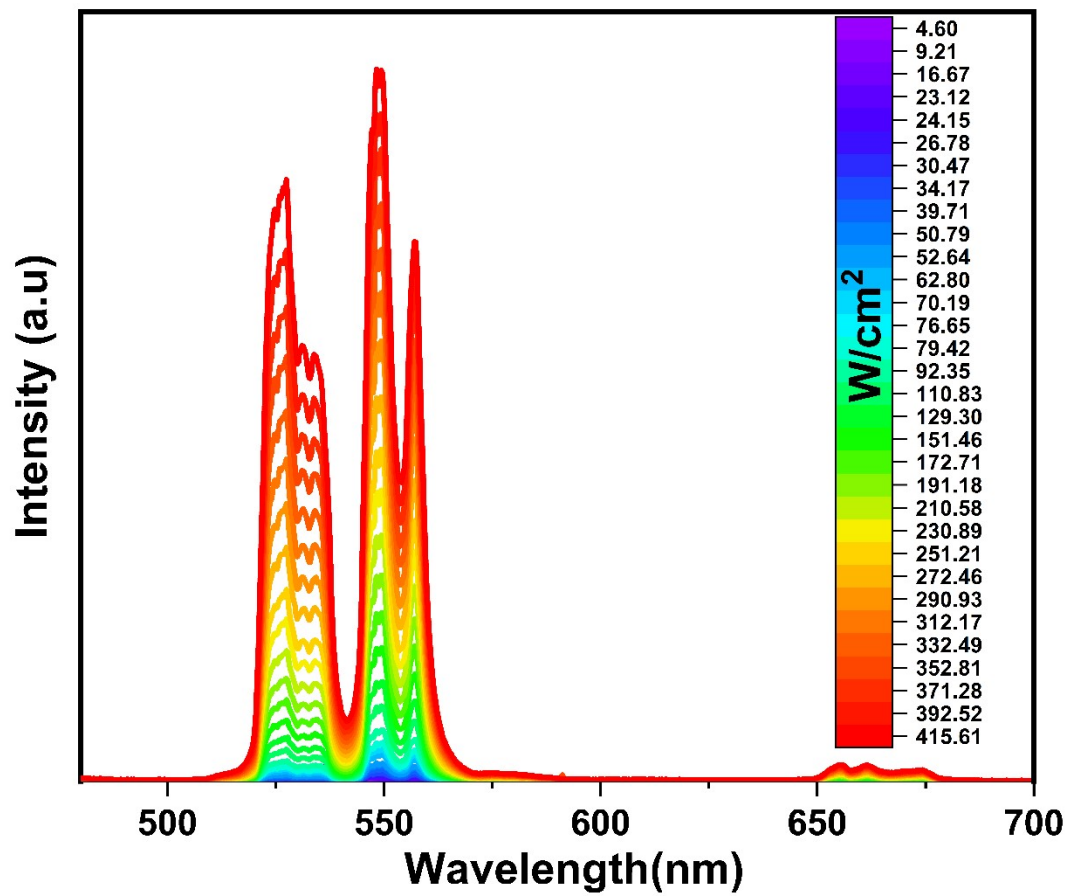

Figure S3. UC spectra of YMO under different pumping powers at room temperature.

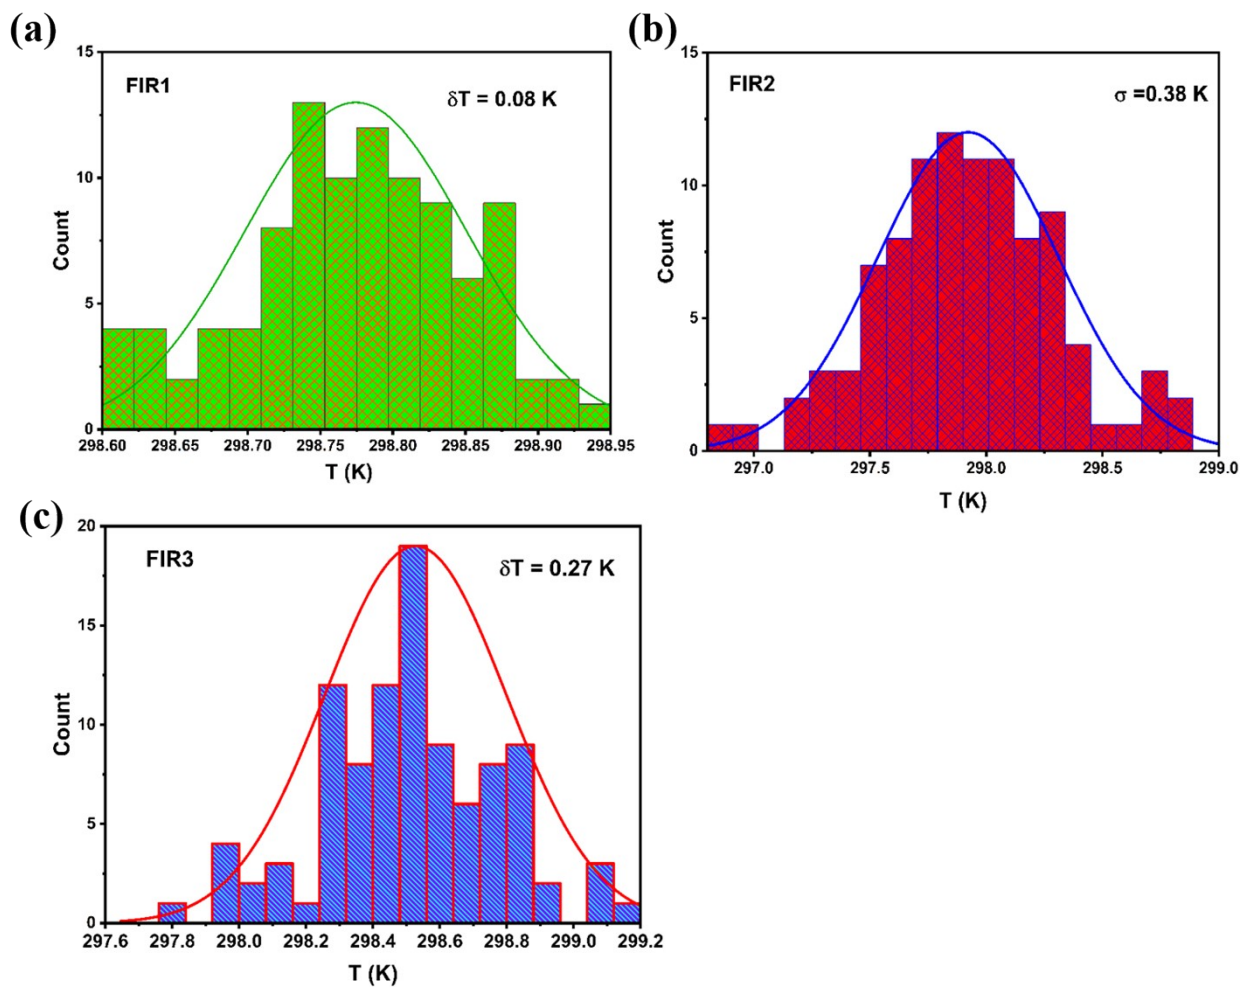

**Figure S4.** Standard deviations at RT for (a) FIR1 ,(b) FIR2 and FIR3 (c) obtained using 100 measurements at 298 K.

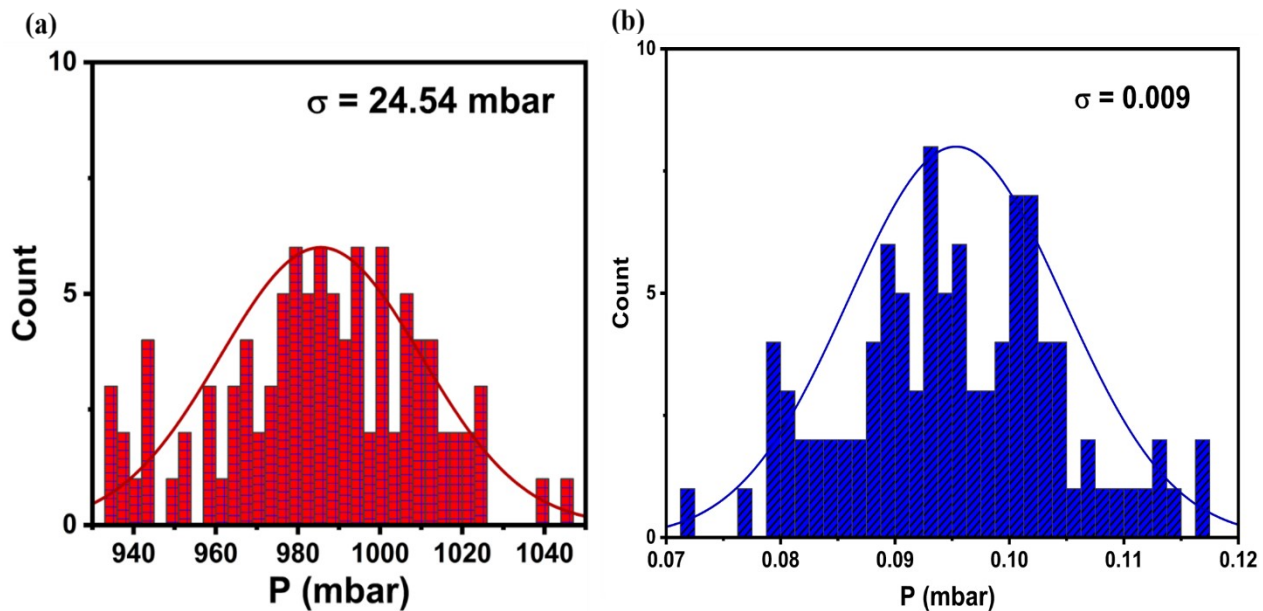

**Figure S5.** Standard deviations for the FIR at (a) 1000 mbar and 0.1 mbar (b) obtained using 100 measurements.

**TableS1:** Refined parameters obtained from fitting of diffractograms YMO.

|                                                                                                                                                                                                                                                                 |
|-----------------------------------------------------------------------------------------------------------------------------------------------------------------------------------------------------------------------------------------------------------------|
| <p>Cryst syst: monoclinic</p> <p>Z= 2</p> <p>Space group P2<sub>1</sub>/c</p> <p>a = 6.8111 Å b= 9.5716 Å c= 10.5100Å</p> <p><math>\alpha=90^\circ</math> <math>\beta = 105.5252^\circ</math> <math>\gamma=90^\circ</math></p> <p>V= 660.1960 Å<sup>3</sup></p> |
|-----------------------------------------------------------------------------------------------------------------------------------------------------------------------------------------------------------------------------------------------------------------|

**TableS2:** the parameters of the fitting and the maximum value of the Sa and Sr.

|                                       | FIR2                                                | FIR3                                                   |
|---------------------------------------|-----------------------------------------------------|--------------------------------------------------------|
| The parameters of the fitting         | A= 19.22<br>B= -0.18<br>C= 5.89 E-4<br>D= -4.99 E-7 | A= 0.07<br>B= -2.50 E-4<br>C= -1.60 E-7<br>D= 1.34 E-9 |
| S <sub>rmax</sub> (%K <sup>-1</sup> ) | 0.8                                                 | 1                                                      |
| S <sub>amax</sub>                     | 0.05                                                | 0.67                                                   |
